# Supplementary material
Source: publisher site journal article supplement (http://iopscience.iop.org/1748-9326/4/4/044008/media/erl9_4_044008supp.pdf)
Supplement: Supplementary file 2 [file erl9_4_044008supp.pdf]

<head><title>Radware Bot Manager Captcha</title><script type="text/javascript">
	window.SSJSInternal = 13231;

	var __uzdbm_1 = "a1a4eefb-eb77-4113-9b5e-eb6ae86476ef";
	var __uzdbm_2 = "YTJkNGRlMTEtODQyNy00YmFkLTgzMTktNTBiMzIzNTE5ZjA2JDMuMTQyLjE5Ny4yMTI=";
	
	(function(w, d, e, u, c, g, a, b){
		w["SSJSConnectorObj"] = w["SSJSConnectorObj"] || {ss_cid : c, domain_info: g};
		a = d.createElement(e);
		a.async = true;
		a.src = u;
		b = d.getElementsByTagName(e)[0];
		b.parentNode.insertBefore(a, b);
	})(window,document,"script","https://cdn.perfdrive.com/aperture/aperture.js","b8c3","auto");
</script>

<script type="text/javascript">

try{
    (function(x){function n(b,g){var c=(b&65535)+(g&65535);return(b>>16)+(g>>16)+(c>>16)<<16|c&65535}function h(b,g,c,a,d,e){b=n(n(g,b),n(a,e));return n(b<<d|b>>>32-d,c)}function k(b,g,c,a,d,e,f){return h(g&c|~g&a,b,g,d,e,f)}function l(b,g,c,a,d,e,f){return h(g&a|c&~a,b,g,d,e,f)}function m(b,g,c,a,d,e,f){return h(c^(g|~a),b,g,d,e,f)}function p(b,g){b[g>>5]|=128<<g%32;b[(g+64>>>9<<4)+14]=g;var c,a=1732584193,d=-271733879,e=-1732584194,f=271733878;for(c=0;c<b.length;c+=16){var y=a;var z=d;var A=e;var B=
        f;a=k(a,d,e,f,b[c],7,-680876936);f=k(f,a,d,e,b[c+1],12,-389564586);e=k(e,f,a,d,b[c+2],17,606105819);d=k(d,e,f,a,b[c+3],22,-1044525330);a=k(a,d,e,f,b[c+4],7,-176418897);f=k(f,a,d,e,b[c+5],12,1200080426);e=k(e,f,a,d,b[c+6],17,-1473231341);d=k(d,e,f,a,b[c+7],22,-45705983);a=k(a,d,e,f,b[c+8],7,1770035416);f=k(f,a,d,e,b[c+9],12,-1958414417);e=k(e,f,a,d,b[c+10],17,-42063);d=k(d,e,f,a,b[c+11],22,-1990404162);a=k(a,d,e,f,b[c+12],7,1804603682);f=k(f,a,d,e,b[c+13],12,-40341101);e=k(e,f,a,d,b[c+14],17,-1502002290);
        d=k(d,e,f,a,b[c+15],22,1236535329);a=l(a,d,e,f,b[c+1],5,-165796510);f=l(f,a,d,e,b[c+6],9,-1069501632);e=l(e,f,a,d,b[c+11],14,643717713);d=l(d,e,f,a,b[c],20,-373897302);a=l(a,d,e,f,b[c+5],5,-701558691);f=l(f,a,d,e,b[c+10],9,38016083);e=l(e,f,a,d,b[c+15],14,-660478335);d=l(d,e,f,a,b[c+4],20,-405537848);a=l(a,d,e,f,b[c+9],5,568446438);f=l(f,a,d,e,b[c+14],9,-1019803690);e=l(e,f,a,d,b[c+3],14,-187363961);d=l(d,e,f,a,b[c+8],20,1163531501);a=l(a,d,e,f,b[c+13],5,-1444681467);f=l(f,a,d,e,b[c+2],9,-51403784);
        e=l(e,f,a,d,b[c+7],14,1735328473);d=l(d,e,f,a,b[c+12],20,-1926607734);a=h(d^e^f,a,d,b[c+5],4,-378558);f=h(a^d^e,f,a,b[c+8],11,-2022574463);e=h(f^a^d,e,f,b[c+11],16,1839030562);d=h(e^f^a,d,e,b[c+14],23,-35309556);a=h(d^e^f,a,d,b[c+1],4,-1530992060);f=h(a^d^e,f,a,b[c+4],11,1272893353);e=h(f^a^d,e,f,b[c+7],16,-155497632);d=h(e^f^a,d,e,b[c+10],23,-1094730640);a=h(d^e^f,a,d,b[c+13],4,681279174);f=h(a^d^e,f,a,b[c],11,-358537222);e=h(f^a^d,e,f,b[c+3],16,-722521979);d=h(e^f^a,d,e,b[c+6],23,76029189);a=h(d^
        e^f,a,d,b[c+9],4,-640364487);f=h(a^d^e,f,a,b[c+12],11,-421815835);e=h(f^a^d,e,f,b[c+15],16,530742520);d=h(e^f^a,d,e,b[c+2],23,-995338651);a=m(a,d,e,f,b[c],6,-198630844);f=m(f,a,d,e,b[c+7],10,1126891415);e=m(e,f,a,d,b[c+14],15,-1416354905);d=m(d,e,f,a,b[c+5],21,-57434055);a=m(a,d,e,f,b[c+12],6,1700485571);f=m(f,a,d,e,b[c+3],10,-1894986606);e=m(e,f,a,d,b[c+10],15,-1051523);d=m(d,e,f,a,b[c+1],21,-2054922799);a=m(a,d,e,f,b[c+8],6,1873313359);f=m(f,a,d,e,b[c+15],10,-30611744);e=m(e,f,a,d,b[c+6],15,-1560198380);
        d=m(d,e,f,a,b[c+13],21,1309151649);a=m(a,d,e,f,b[c+4],6,-145523070);f=m(f,a,d,e,b[c+11],10,-1120210379);e=m(e,f,a,d,b[c+2],15,718787259);d=m(d,e,f,a,b[c+9],21,-343485551);a=n(a,y);d=n(d,z);e=n(e,A);f=n(f,B)}return[a,d,e,f]}function t(b){var g,c="",a=32*b.length;for(g=0;g<a;g+=8)c+=String.fromCharCode(b[g>>5]>>>g%32&255);return c}function q(b){var g,c=[];c[(b.length>>2)-1]=void 0;for(g=0;g<c.length;g+=1)c[g]=0;var a=8*b.length;for(g=0;g<a;g+=8)c[g>>5]|=(b.charCodeAt(g/8)&255)<<g%32;return c}function u(b){return t(p(q(b),
        8*b.length))}function v(b,g){var c,a=q(b),d=[],e=[];d[15]=e[15]=void 0;16<a.length&&(a=p(a,8*b.length));for(c=0;16>c;c+=1)d[c]=a[c]^909522486,e[c]=a[c]^1549556828;c=p(d.concat(q(g)),512+8*g.length);return t(p(e.concat(c),640))}function w(b){var g="",c;for(c=0;c<b.length;c+=1){var a=b.charCodeAt(c);g+="0123456789abcdef".charAt(a>>>4&15)+"0123456789abcdef".charAt(a&15)}return g}function r(b,g,c){g?c?b=v(unescape(encodeURIComponent(g)),unescape(encodeURIComponent(b))):(b=v(unescape(encodeURIComponent(g)),
        unescape(encodeURIComponent(b))),b=w(b)):b=c?u(unescape(encodeURIComponent(b))):w(u(unescape(encodeURIComponent(b))));return b}"function"===typeof define&&define.amd?define("md5",function(){return r}):"object"===typeof module&&module.exports?module.exports=r:x.md5=r})(this);
} catch (e) {
    //ignore
}
</script>

<script type="text/javascript">

var $jscomp=$jscomp||{};$jscomp.scope={};$jscomp.arrayIteratorImpl=function(a){var b=0;return function(){return b<a.length?{done:!1,value:a[b++]}:{done:!0}}};$jscomp.arrayIterator=function(a){return{next:$jscomp.arrayIteratorImpl(a)}};$jscomp.makeIterator=function(a){var b="undefined"!=typeof Symbol&&Symbol.iterator&&a[Symbol.iterator];if(b)return b.call(a);if("number"==typeof a.length)return $jscomp.arrayIterator(a);throw Error(String(a)+" is not an iterable or ArrayLike");};
var radCfco=!1,radCfdbs=null,radCfresOp="",radCfeMap={};function oco(){hOpenRad()}function ocs(){hSolvedRad()}function hOpenRad(){try{radCfco=!0,mb3tx()}catch(a){radSetErrCook("hop",a.toString())}}
function hSolvedRad(){var a="Hnyf7MTcBK",b="Bdr9HvhYUw";try{if(hcaptcha){var d=hcaptcha.getRespKey(),c=hcaptcha.getResponse();10<=d.length&&(a=d.substring(d.length-10));10<=c.length&&(b=c.substring(c.length-10))}else a="Unyf7MTcBK",b="Udr9HvhYUw"}catch(e){a="Enyf7MTcBK",b="Edr9HvhYUw"}try{ldlnb(a,b),mb4tx()}catch(e){radSetErrCook("hsol",e.toString())}}
function xrcpc(a,b,d){try{if(d){var c=new Date;c.setTime(c.getTime()+6E4*d);var e="; expires="+c.toGMTString()}else e="";document.cookie=a+"="+b+e+"; path=/"}catch(k){}}function otkhd(a){var b="",d="",c=[];for(e in a)c.push([e,a[e]]);for(;0<c.length;){a=c.splice(Math.floor(Math.random()*c.length),1)[0];var e=a[0];d+=a[1];b+=e}return d+b+getRandomNumber().toString()}function getRandomNumber(){return Math.floor(9E4*Math.random())+1E4}
function mdhx(a){try{return md5(a)}catch(b){return"ecb5e100e5a9a3e7f6d1fd97512215282"}}function getQueryParams(a){var b={};a.slice(a.indexOf("?")+1).split("&").map(function(d){var c=$jscomp.makeIterator(d.split("="));d=c.next().value;c=c.next().value;b[d]=decodeURIComponent(c)});return b}function getPidDigestSalt(){try{var a=getQueryParams(window.location.href),b=void 0!==a.ssi?a.ssi:void 0!==a.iid?a.iid:"00000";return b.substring(b.length-5)}catch(d){return"0xcvd"}}
function ldlnb(a,b){try{var d=getRandomNumber().toString(),c=getRandomNumber().toString(),e=Math.floor(Date.now()/1E3).toString(),k=e.substring(0,5),f=e.substring(5);e=radCfco?"1":"0";var g=getPidDigestSalt(),h=otkhd({1:d,2:"1",3:k,4:e,5:c,6:f,7:g,8:a,9:b}),l=mdhx(h);d="cbf"+g;h+=l;var m=document.getElementById("cf_input");m&&(m.value=h);xrcpc(d,h,2)}catch(n){radSetErrCook("csol",n.toString())}}
try{document.addEventListener("DOMContentLoaded",function(){var a,b=0,d="cbfm"+getPidDigestSalt(),c=0,e=0,k=0,f=0;document.addEventListener("mousedown",function(g){a=(new Date).getTime()});document.addEventListener("mouseup",function(g){a&&(f=(new Date).getTime(),k=f-a,c=g.x,e=g.y,xrcpc(d,c+"-"+e+"-"+k+"-"+b+"-"+f,2),a=null)});document.addEventListener("mousemove",function(g){b+=1});setInterval(function(){xrcpc(d,c+"-"+e+"-"+k+"-"+b+"-"+f,2)},2E3)})}catch(a){radSetErrCook("mcl")}
try{document.addEventListener("DOMContentLoaded",function(){var a,b=0,d="cbft"+getPidDigestSalt(),c=0,e=0,k=0,f=0;document.addEventListener("touchstart",function(g){var h=g.touches[0];g=h.clientX;h=h.clientY;a=(new Date).getTime();c=g;e=h});document.addEventListener("touchend",function(g){var h=g.changedTouches[0];g=h.clientX;h=h.clientY;a&&(f=(new Date).getTime(),k=f-a,c=g,e=h,xrcpc(d,c+"-"+e+"-"+k+"-"+b+"-"+f,2),a=null)});document.addEventListener("touchmove",function(g){b+=1});setInterval(function(){xrcpc(d,
c+"-"+e+"-"+k+"-"+b+"-"+f,2)},2E3)})}catch(a){radSetErrCook("tcl")}try{document.addEventListener("DOMContentLoaded",function(){setInterval(function(){try{for(var a={},b=document.getElementsByTagName("*"),d=0;d<b.length;d++)for(var c=b[d].className.split(" "),e=0;e<c.length;e++){var k=c[e].trim();""!==k&&(a[k]=!0)}var f=Object.keys(a).join(","),g="cbfcl"+getPidDigestSalt();xrcpc(g,f,2)}catch(h){radSetErrCook("cl")}},2E3)})}catch(a){}
function hcD(){try{for(var a=document.body.getElementsByTagName("div"),b=null,d=a.length-1;0<=d;d--){var c=a[d];if("body"===c.parentElement.tagName.toLowerCase()){b=c;break}}if(null!==b){var e=b.getElementsByTagName("iframe");if(0<e.length&&e[0].src.includes("hcaptcha"))return b}}catch(k){}return null}try{document.addEventListener("DOMContentLoaded",function(){setTimeout(function(){var a=hcD();null!==a&&(radCfdbs=a.outerHTML)},500)})}catch(a){radSetErrCook("csil")}
function mb3tx(){try{var a="3",b="xz",d="y",c="k",e="0",k="0",f=hcD();if(null!==f){var g=f.outerHTML;null!==radCfdbs&&(a=g!=radCfdbs?"1":"2");b=f.style.display;d=f.style.opacity;c=f.style.visibility;"block"==b&&(b="blk");"visible"==c&&(c="vbe");"hidden"==c&&(c="hdn");var h=f.querySelector("div");e=h.style.width;k=h.style.height;radCfresOp=Math.floor(Date.now()/1E3).toString()+"-"+a+"-"+d+"-"+c+"-"+b+"-"+k.replace("px","")+"-"+e.replace("px","")}}catch(l){radSetErrCook("csso")}}
function mb4tx(){try{var a="3",b="xz",d="y",c="k",e="0",k="0",f=hcD();if(null!==f){var g=f.outerHTML;null!==radCfdbs&&(a=g!=radCfdbs?"1":"2");b=f.style.display;d=f.style.opacity;c=f.style.visibility;"block"==b&&(b="blk");"visible"==c&&(c="vbe");"hidden"==c&&(c="hdn");var h=f.querySelector("div");e=h.style.width;k=h.style.height;var l=a+"-"+d+"-"+c+"-"+b+"-"+k.replace("px","")+"-"+e.replace("px",""),m="cbfcs"+getPidDigestSalt();xrcpc(m,radCfresOp+"::"+l,2)}}catch(n){radSetErrCook("cssl")}}
function radSetErrCook(a,b){try{radCfeMap[a]=void 0===b?1:b,xrcpc("cbfer"+getPidDigestSalt(),JSON.stringify(radCfeMap),2)}catch(d){xrcpc("cbfer"+getPidDigestSalt(),d.toString(),2)}};

</script>

</head><div>
  <link rel="stylesheet" type="text/css" href="https://captcha.perfdrive.com/captcha-public/css/shieldsquare_styles.min.css">
</div>
<div class="container">
  <div>
    <div>
      <img src="https://cdn.images.iop.org/website-logos/IOP-Publishing-300x83.jpg" alt="Captcha Page">
    </div>
  </div>
  <div>
    <div>
      <h2>We apologize for the inconvenience...</h2>
      <p>To ensure we keep this website safe, please can you confirm you are a human by ticking the box below. </p>
      <p>If you are unable to complete the above request please contact us using the below link, providing a screenshot of your experience.</p>
      <p>
        <a href="https://ioppublishing.org/contacts/">https://ioppublishing.org/contacts/</a>
      </p>
    </div>
  </div>
  <div class="row">
    <center>
      <strong>Incident ID: a2d4de11-8427-4bad-8319-50b323519f06</strong>
    </center>

    <center>
       <div class="captcha-mid">
            <!-- *Required - Uncomment the below commented php code and remove 'echo 1234' before submit -->
            <form action="" method=POST style="width:300px;margin-left:auto;margin-right:auto;">
            <script src="https://cn1.hcaptcha.com/1/api.js?endpoint=https://cn1.hcaptcha.com&assethost=https://assets-cn1.hcaptcha.com&imghost=https://imgs-cn1.hcaptcha.com&reportapi=https://reportapi-cn1.hcaptcha.com" async defer></script>
            <div class="h-captcha" data-sitekey="ae73173b-7003-44e0-bc87-654d0dab8b75" data-open-callback="hOpenRad" data-callback="hSolvedRad"></div><br>
            <center><input id="cf_input" type="hidden" name="cfi" value="">
            <br><input type="submit" class="btn btn-success btn-sm" Value="Submit"><br></center>
            </form>
                                                     </div>
    </center>
  </div>
</div>
